# Supplementary material
Source: ML conference proceedings conference paper supplement (https://aclanthology.org/D19-1632)
Supplement: Attachment [file D19-1632.Attachment.zip]

## A List of Topics

| topic           | proportion (%) |       |
|-----------------|----------------|-------|
|                 | ne-en          | si-en |
| General         | 18.3           | 24.1  |
| History         | 6.5            | 15.1  |
| Science         | 7.4            | 12.7  |
| Religion        | 8.9            | 10.5  |
| Social Sciences | 10.2           | 6.9   |
| Biology         | 6.3            | 9.1   |
| Geography       | 10.6           | 4.6   |
| Art/Culture     | 6.7            | 8.3   |
| Sports          | 5.8            | 6.7   |
| Politics        | 8.1            | N/A   |
| People          | 7.4            | N/A   |
| Law             | 3.9            | 2.0   |

Table 1: Distribution of the topics of the sentences in the dev, devtest and test sets according to the Wikipedia document they were sampled from.

## B Statistics of automatic filtering and manual filtering

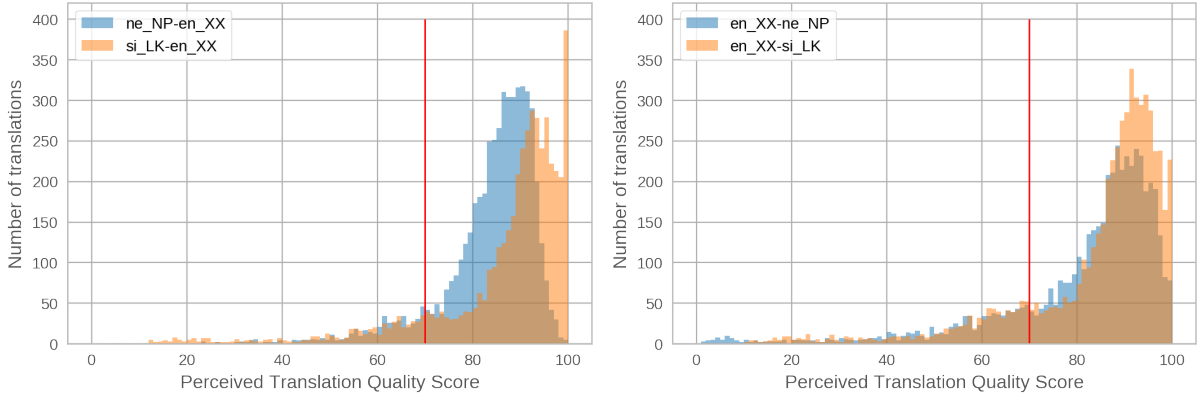

Figure 1: Histogram of averaged translation quality score. We ask three different raters to rate each sentence from 0–100 according to the perceived translation quality. In our guidelines, the 0–10 range represents a translation that is completely incorrect and inaccurate; the 11–29 range represents a translation with few correct keywords, but the overall meaning is different from the source; the 30–50 range represents a translation that contains translated fragments of the source string, with major mistakes; the 51–69 range represents a translation which is understandable and conveys the overall meaning of source string but contains typos or grammatical errors; the 70–90 range represents a translation that closely preserves the semantics of the source sentence; and the 90–100 range represents a *perfect* translation. Translations with averaged translation score less than 70 (red line) are removed from the dataset.

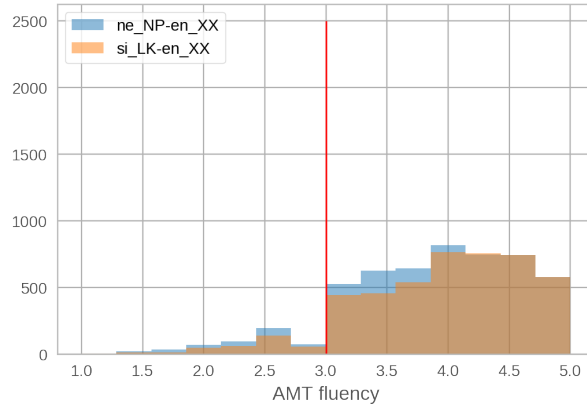

Figure 2: Histogram of averaged AMT fluency score of English translations. We ask five different raters to rate each sentence from 1–5 according to its fluency. In our guidelines, the 1–2 range represents a sentence that is not fluent, 3 is neutral, while the 4–5 range is for fluent sentences that raters can easily understand. Translations with averaged fluency score less than 3 (red line) are removed from the dataset.

|                            | Nepali–English | English–Nepali | Sinhala–English | English–Sinhala |
|----------------------------|----------------|----------------|-----------------|-----------------|
| <b>Automatic filtering</b> | 14%            | 18%            | 24%             | 7%              |
| <b>Manual filtering</b>    |                |                |                 |                 |
| Translation quality        | 10%            | 19%            | 13%             | 16%             |
| Fluency                    | 10%            | -              | 17%             | -               |

Table 2: Percentage of translations that did not pass the automatic and manual filtering checks. We first use automatic methods to filter out poor translations and send those translations back for rework. We then collect translations that pass the automatic filtering and send them to two human quality checks, one for adequacy and the other for fluency. Note that the percentage of sentences that did not pass manual filtering is among those sentences that passed the automatic filtering.

## C List of Wikipedia Documents

| domain           | document/gloss                                      | topic           |
|------------------|-----------------------------------------------------|-----------------|
| en.wikipedia.org | <a href="#">Astronomy</a>                           | Science         |
| en.wikipedia.org | <a href="#">History of radar</a>                    | History         |
| en.wikipedia.org | <a href="#">Shoe</a>                                | General         |
| en.wikipedia.org | <a href="#">Tire</a>                                | General         |
| en.wikipedia.org | <a href="#">Indian cuisine</a>                      | Art/Culture     |
| en.wikipedia.org | <a href="#">iPhone</a>                              | General         |
| en.wikipedia.org | <a href="#">Apollo program</a>                      | History         |
| en.wikipedia.org | <a href="#">Chess</a>                               | General         |
| en.wikipedia.org | <a href="#">Honey</a>                               | General         |
| en.wikipedia.org | <a href="#">Police</a>                              | Law             |
| en.wikipedia.org | <a href="#">Desert</a>                              | Geography       |
| en.wikipedia.org | <a href="#">Slavery</a>                             | Social Sciences |
| en.wikipedia.org | <a href="#">Riddler</a>                             | Art/Culture     |
| en.wikipedia.org | <a href="#">Diving</a>                              | Sports          |
| en.wikipedia.org | <a href="#">Cat</a>                                 | Biology         |
| en.wikipedia.org | <a href="#">Boxing</a>                              | Sports          |
| en.wikipedia.org | <a href="#">White wine</a>                          | General         |
| en.wikipedia.org | <a href="#">Creativity</a>                          | Social Sciences |
| en.wikipedia.org | <a href="#">Capitalism</a>                          | Social Sciences |
| en.wikipedia.org | <a href="#">Alaska</a>                              | Geography       |
| en.wikipedia.org | <a href="#">Museum</a>                              | General         |
| en.wikipedia.org | <a href="#">Lifeguard</a>                           | General         |
| en.wikipedia.org | <a href="#">Tennis</a>                              | Sports          |
| en.wikipedia.org | <a href="#">Writer</a>                              | General         |
| en.wikipedia.org | <a href="#">Anatomy</a>                             | Science         |
| si.wikipedia.org | <a href="#">Qoran</a>                               | Religion        |
| si.wikipedia.org | <a href="#">Dhammas</a>                             | Religion        |
| si.wikipedia.org | <a href="#">Vegetation</a>                          | Science         |
| si.wikipedia.org | <a href="#">Names of Colombo Students</a>           | History         |
| si.wikipedia.org | <a href="#">Titanic</a>                             | History         |
| si.wikipedia.org | <a href="#">The Heart</a>                           | Biology         |
| si.wikipedia.org | <a href="#">The Ear</a>                             | Biology         |
| si.wikipedia.org | <a href="#">Theravada</a>                           | Religion        |
| si.wikipedia.org | <a href="#">WuZetian</a>                            | History         |
| si.wikipedia.org | <a href="#">Psychoanalysis</a>                      | Science         |
| si.wikipedia.org | <a href="#">Angulimala</a>                          | Religion        |
| si.wikipedia.org | <a href="#">Insurance</a>                           | General         |
| si.wikipedia.org | <a href="#">Leafart</a>                             | Art/Culture     |
| si.wikipedia.org | <a href="#">Communication Science</a>               | Science         |
| si.wikipedia.org | <a href="#">Pharaoh Neferneferuaten</a>             | History         |
| ne.wikipedia.org | <a href="#">Nelson Mandela</a>                      | People          |
| ne.wikipedia.org | <a href="#">Parliament of India</a>                 | Politics        |
| ne.wikipedia.org | <a href="#">Kailali and Kanchanpur</a>              | Geography       |
| ne.wikipedia.org | <a href="#">Bhuwan Pokhari</a>                      | Geography       |
| ne.wikipedia.org | <a href="#">COPD</a>                                | Biology         |
| ne.wikipedia.org | <a href="#">KaalSarp Yoga</a>                       | Religion        |
| ne.wikipedia.org | <a href="#">Research Methodology in Economics</a>   | Social Sciences |
| ne.wikipedia.org | <a href="#">Essay</a>                               | Social Sciences |
| ne.wikipedia.org | <a href="#">Mutation</a>                            | Science         |
| ne.wikipedia.org | <a href="#">Maoist Constituent Assembly</a>         | Politics        |
| ne.wikipedia.org | <a href="#">Patna</a>                               | Geography       |
| ne.wikipedia.org | <a href="#">Federal rule system</a>                 | Law             |
| ne.wikipedia.org | <a href="#">Newari Community</a>                    | Art/Culture     |
| ne.wikipedia.org | <a href="#">Raka's Dynasty</a>                      | History         |
| ne.wikipedia.org | <a href="#">Rice</a>                                | Biology         |
| ne.wikipedia.org | <a href="#">Breastfeeding</a>                       | Biology         |
| ne.wikipedia.org | <a href="#">Earthquake</a>                          | Science         |
| ne.wikipedia.org | <a href="#">Motiram Bhatta</a>                      | People          |
| ne.wikipedia.org | <a href="#">Novel Magazine</a>                      | Art/Culture     |
| ne.wikipedia.org | <a href="#">Vladimir Putin</a>                      | Politics        |
| ne.wikipedia.org | <a href="#">History of Nelali Literature</a>        | History         |
| ne.wikipedia.org | <a href="#">Income tax</a>                          | Law             |
| ne.wikipedia.org | <a href="#">Ravi Prasjal<sup>+</sup></a>            | People          |
| ne.wikipedia.org | <a href="#">Yogchudamani Upanishads<sup>+</sup></a> | Religion        |
| ne.wikipedia.org | <a href="#">Sedai<sup>+</sup></a>                   | Religion        |

Table 3: List of documents by Wikipedia domain, their document name or English translation, and corresponding topics. The document name has an hyper-reference to the original document. <sup>+</sup> denotes a page that has been removed or no longer available at the time of this submission.

## D Examples from *devtest*

|                                                                                                                            |                                                                                                                                 |
|----------------------------------------------------------------------------------------------------------------------------|---------------------------------------------------------------------------------------------------------------------------------|
| En→Ne                                                                                                                      |                                                                                                                                 |
| Source                                                                                                                     | It has automatic spell checking and correction, predictive word capabilities, and a dynamic dictionary that learns new words.   |
| References                                                                                                                 | A यसमा स्वचालित हिज्जे जाँच र सुधार छ , भविष्यवाणी शब्द क्षमताहरु , र गतिशील शब्दकोश हुन्छ जसले नयाँ शब्दहरु सिक्छ ।            |
|                                                                                                                            | B यसमा स्वचालित हिज्जे जाच्ने तथा सच्याउने , शब्दहरूको अनुमान गर्ने , तथा नयाँ शब्दहरु सिक्ने स्फुर्त शब्दकोश हुन्छ ।           |
| System                                                                                                                     | यसमा स्वचालित हिज्जे जाँच र सुधार , पूर्वानुमान शब्द क्षमता र नयाँ शब्द सिक्ने गतिशील शब्दकोश छ ।                               |
| Source The academic research tended toward the improvement of basic technologies, rather than their specific applications. |                                                                                                                                 |
| References                                                                                                                 | A शैक्षिक अनुसन्धानले उनीहरूको विशिष्ट अनुप्रयोगहरूको सट्टा आधारभूत प्रविधिको सुधारको पक्षमा जोड दिए ।                          |
|                                                                                                                            | B यो शैक्षणिक अनुसन्धान सामान्य प्रविधिको सुधार तर्फ ढलकिएको छ , नाकि तिनिहरूको विशेष प्रयोग तर्फ ।                             |
| System                                                                                                                     | प्राध्यापक अनुसन्धानले उनीहरूको विशिष्ट अनुप्रयोगभन्दा पनि आधारभूत प्रविधिको सुधारतिर टेवा पुर्‍यायो ।                          |
| Ne→En                                                                                                                      |                                                                                                                                 |
| Source                                                                                                                     | पुरानो समयमा राजालाई सल्लाह दिने सभा ' संसद ' कहलाउँथ्यो ।                                                                      |
| References                                                                                                                 | A In the past, the assembly that advised the king were called 'parliament'.                                                     |
|                                                                                                                            | B In old times the counsil that gave advice to the king was called 'parliament'.                                                |
| System                                                                                                                     | In old times the council of counsel to the king was 'Senate'.                                                                   |
| Source                                                                                                                     | कार्यकर्ताका रूपमा अफ्रिकन नेशनल कांग्रेसमा आबद्ध भए ।                                                                          |
| References                                                                                                                 | A As a worker African Mandela joined the Congress party.                                                                        |
|                                                                                                                            | B He joined the African National Congress as a activist.                                                                        |
| System                                                                                                                     | As a worker, he joined the African National Congress.                                                                           |
| En→Si                                                                                                                      |                                                                                                                                 |
| Source                                                                                                                     | Iphone users can and do access the internet frequently, and in a variety of places.                                             |
| References                                                                                                                 | A फेडिगेण्त बावीना करन्तन्तठिं तीतरम डन वीर्विड ड्ढानवलेदै ऐत्तर्त्तृत्तृत्त ठिवीडीड थान्कीड .                                  |
|                                                                                                                            | B Iphone डर्तीलेकडित्ठिं थठिं तीतरम वीर्विड ड्ढानवलेदै ऐत्तर्त्तृत्तृत्त वेत्त ठिवीडीठठिं थान्कीड .                             |
| System                                                                                                                     | फेडिगेण्त बावीना करन्तन्तठिं ड्ढठिवत्त वेशेत्त ऐत्तर्त्तृत्तृत्त ठिं तर ठिवीडेत्तन्त ड्ढठिवत्त . ड्ठ वेशेत्त वीर्विड थान्कीड    |
| Source                                                                                                                     | In Serious meets, the absolute score is somewhat meaningless.                                                                   |
| References                                                                                                                 | A डान्क तरत्त वलेदै लेकुञ्छ डान्कैत्त नेरुम्क थान्की डर्तीडवकीड .                                                               |
|                                                                                                                            | B वान्कन्त लेले वले , तीरसेक्क लेकुञ्छ तरम्क तीक्केले ड .                                                                       |
| System                                                                                                                     | डीरडड थत्रवे , तीरसेक्क लेकुञ्छ कीडीमी नेरुम्क थान्की                                                                           |
| Si→En                                                                                                                      |                                                                                                                                 |
| Source                                                                                                                     | तरत्त , ठार्वीरक थींसनड , देंपले थान्कीड , डतर दैत्त डन ठरान्कीमे मेत्त द्दुठिमीड .                                             |
| References                                                                                                                 | A Threatening, physical violence, property damage, assault and execution are these punishments.                                 |
|                                                                                                                            | B Threats, bodily violence, property damages, assaults and killing are these punishments.                                       |
| System                                                                                                                     | Threats, physical harassment, property damage, strike and killing this punishment.                                              |
| Source                                                                                                                     | ऐदि डान्कडेत ड्डु थें ड्डिल्ले ड्डुककठिं लुठु करन्तन्त ठें रोरुं तन्तवडन्त तीडान्क डंडडान्क लेडडिडडवनेत्त तीतरम लुठिवत्त वेती . |
| References                                                                                                                 | A After education priests leave ordination in order to fulfill duties to the family or due to sickness.                         |
|                                                                                                                            | B Sangha is often abandoned because of education or after fulfilling family responsibilities or because of illness.             |
| System                                                                                                                     | After education or to fulfill the family's disease or disease conditions, the companion is often removed from substance.        |

Table 4: Examples of sentences from the En-Ne, Ne-En, En-Si and Si-En *devtest* set. System hypotheses (System) are generated using the semi-supervised model described in the main paper using beam search decoding.
